# Supplementary material for: Photovoltaic-enhanced water splitting properties of low-temperature-synthesized BiVO4 photoanode films
Source: Royal Society of Chemistry journal article supplement (doi:10.1039/d4cp01385a), 2024-01-01
Supplement: d4cp01385a1.pdf [file d4cp01385a1.pdf]

## Supporting Information

### Photovoltaic-enhanced water splitting properties of low-temperature synthesis BiVO<sub>4</sub> photoanode films

Lei Shi<sup>a</sup>, Wenyue Zhao<sup>a, b, c</sup>, Nan Zhang<sup>a</sup>, Zhao Wang<sup>a</sup>, Wenjing Hua<sup>a</sup>, Xiaoxia Yang<sup>d</sup>, Weidong Fei<sup>a \*</sup>,  
Yu Zhao<sup>a, b \*\*</sup>

<sup>a</sup> School of Materials Science and Engineering, Harbin Institute of Technology, Harbin 150001, China

<sup>b</sup> Laboratory for Space Environment and Physical Sciences, Harbin Institute of Technology, Harbin 150001, PR China

<sup>c</sup> School of Instrumentation Science and Engineering, Harbin Institute of Technology, Harbin 150001, PR China

<sup>d</sup> School of Astronautics, Harbin Institute of Technology, Harbin 150001, China

BVO-ITO photoanode films with different thicknesses were prepared by sol-gel spin coating method. The phase, element composition and oxygen evolution performance of the materials were analyzed. BVO photoanodes with a thickness of 90, 120, 150, 180 and 210 nm are represented by BVO-*x* (*x*=90, 120, 150, 180, 210), respectively.

---

\* Corresponding author: Weidong Fei, E-mail: wdfei@hit.edu.cn

\*\* Corresponding author: Yu Zhao, E-mail: yuzhao@hit.edu.cn

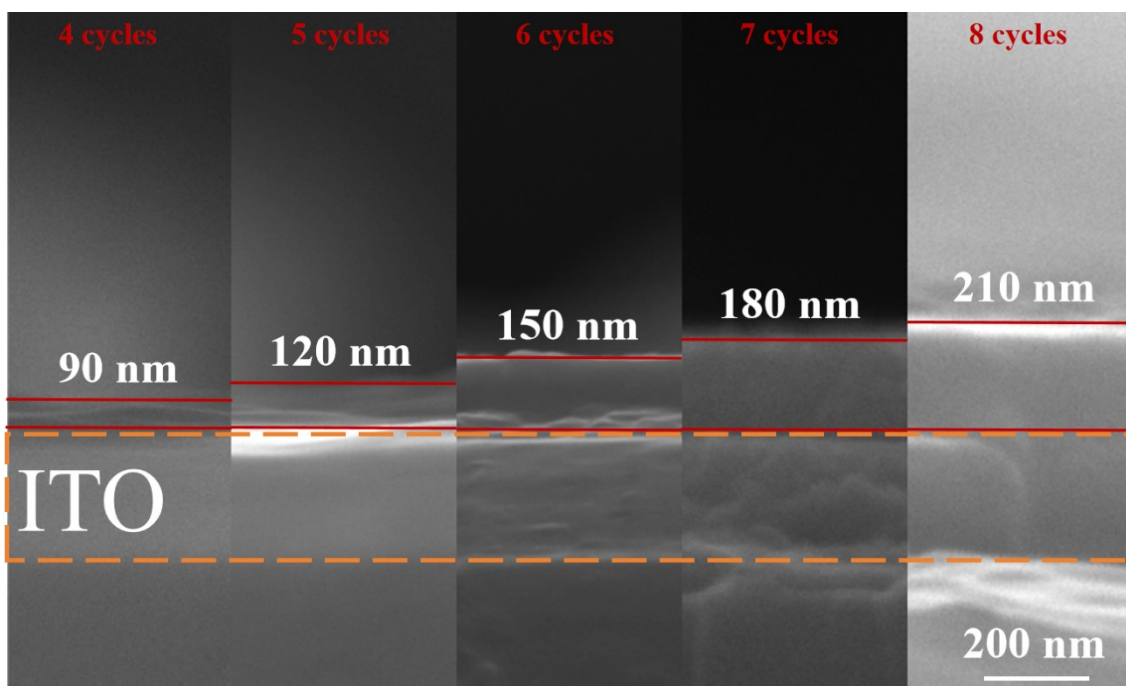

**Fig. S1** Out-of-plane SEM image of BVO photoanodes with spin coating 4~8 cycles.

**Fig. S2** Plot of  $[ah\nu]^2$  as a function of  $h\nu$  of BVO- $x$  ( $x=90, 120, 150, 180, 210$ ) photoanodes.

**Fig. S3** Fine scanning XPS O 1s spectra of (a) BVO-90, (b) BVO-150, (c) BVO-180, (d) BVO-210 photoanodes.

**Fig. S4** (a)  $J-V$  curves and (b)  $J-t$  curves (1.23 V vs RHE) of BVO- $x$  ( $x=90, 120, 150, 180, 210$ ) photoanodes under repeated AM-1.5G light on and off switching.

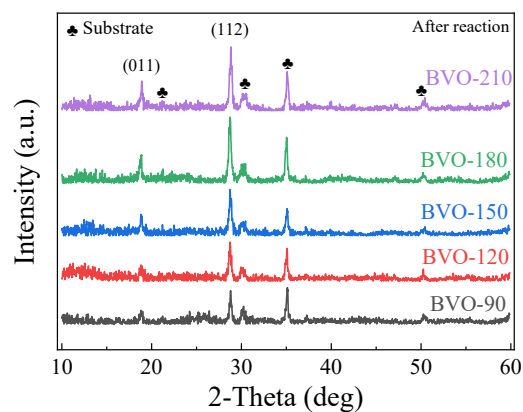

**Fig. S5** XRD patterns of BVO- $x$  ( $x=90, 120, 150, 180, 210$ ) photoanodes after oxygen evolution reaction.

**Fig. S6** Mott-Schottky plots of BVO- $x$  ( $x=90, 120, 150, 180, 210$ ) photoanodes.

**Fig. S7**  $J-V$  curves of (a) BVO-90, (b) BVO-150, (c) BVO-180, (d) BVO-210 under dark and lights illumination (measured in two-electrode system).

**Fig. S8**  $J-t$  curves of BVO- $x$  ( $x=90, 120, 150, 180, 210$ ) photoanodes under repeated (a) 365 nm, (b) 450 nm, (c) 520 nm light on and off switching (zero bias).
